# Supplementary material
Source: publisher figshare collection journal article supplement (https://tandf.figshare.com/ndownloader/files/13079606)
Supplement: Supplementary file 1 [file 13079606]

# APPENDIX

# Table A1. Compressive stiffness of the Hybrid III neck during temperature tests

|  | **Stiffness (N/mm)** | | | |
| --- | --- | --- | --- | --- |
| **0°C** | **12.5°C** | **25 °C** | **37.5 °C** |
| **Rate 1** | 1453 | 938 | 713 | 619 |
| **Rate 2** | 1683 | 1061 | 782 | 662 |
| **Rate 3** | 1739 | 1112 | 806 | 669 |
|  |  |  |  |  |

Table A2. Parameter values of exponential fit with 95% confidence intervals (Eq. 1, Figure 5)

|  | ***A* (Asymptote)** | ***B* (Scale)** | ***C* (Decay Rate) x10-2** |
| --- | --- | --- | --- |
| **Rate 1** | -3805 [-3875, -3735] | -6363 [-6435, -6291] | -6.698 [-6.878, -6.518] |
| **Rate 2** | -3940 [-4022, -3857] | -7844 [-7931, -7758] | -6.496 [-6.676, -6.315] |
| **Rate 3** | -3758 [-3853, -3663] | -8414 [-8511, -8317] | -5.930 [-6.095, -5.765] |
